# Supplementary material for: Uncommon P1 Anchor-featured Viral T Cell Epitope Preference within HLA-A*2601 and HLA-A*0101 Individuals
Source: PubMed Central journal article supplement (PMC11220742; doi:10.4049/immunohorizons.2400026), 2024-06-17
Supplement: IH_2400026_Supplemental_1.pdf [file IH_2400026_Supplemental_1.pdf]

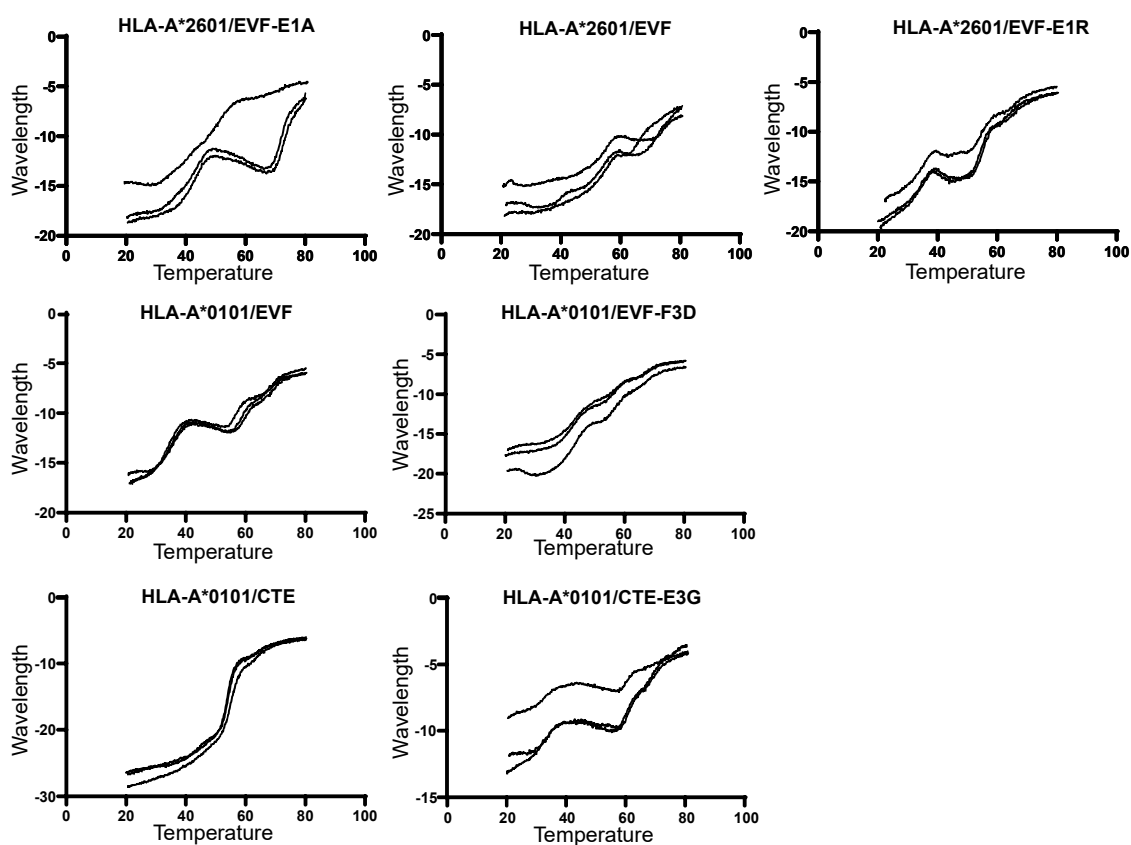

**Figure S1.** The CD original data of HLA/peptide complexes. CD spectra of HLA-A\*0101 and HLA\*2601 complexed with peptides are collected at the wavelength of 218nm and recorded in 20mM Tris, 50mM NaCl buffer(pH=8).

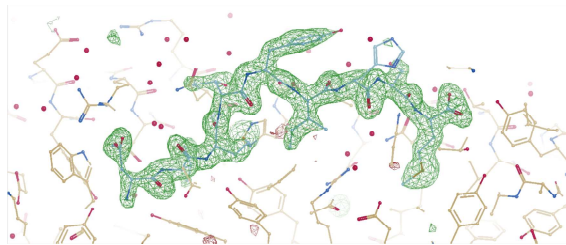

HLA-A\*2601/DVM

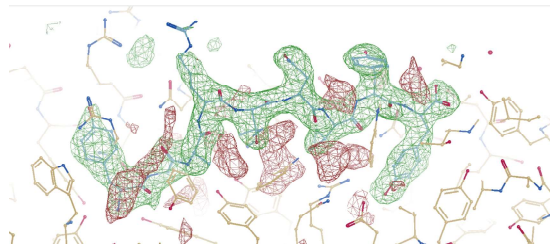

HLA-A\*2601/YVA

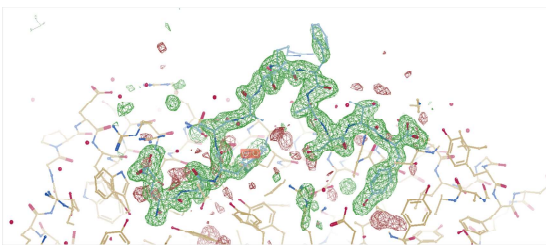

HLA-A\*2601/EVF

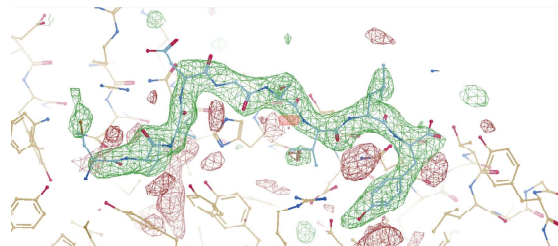

HLA-A\*2601/CVA

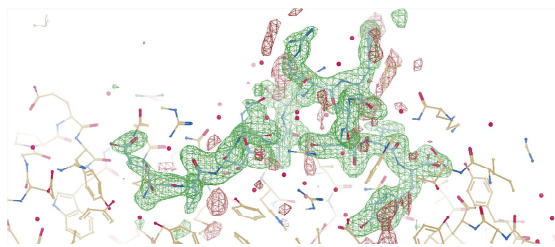

HLA-A\*0101/EVF-F3D

**Figure S2.** Omit Map Analysis of peptides in HLA/peptides complexes. The omit map analysis performed for five HLA-A/peptide complex. Green mesh represents electron density at contour level  $3\sigma$ , overlaid on the molecular structure. The chain of peptide showed in green.

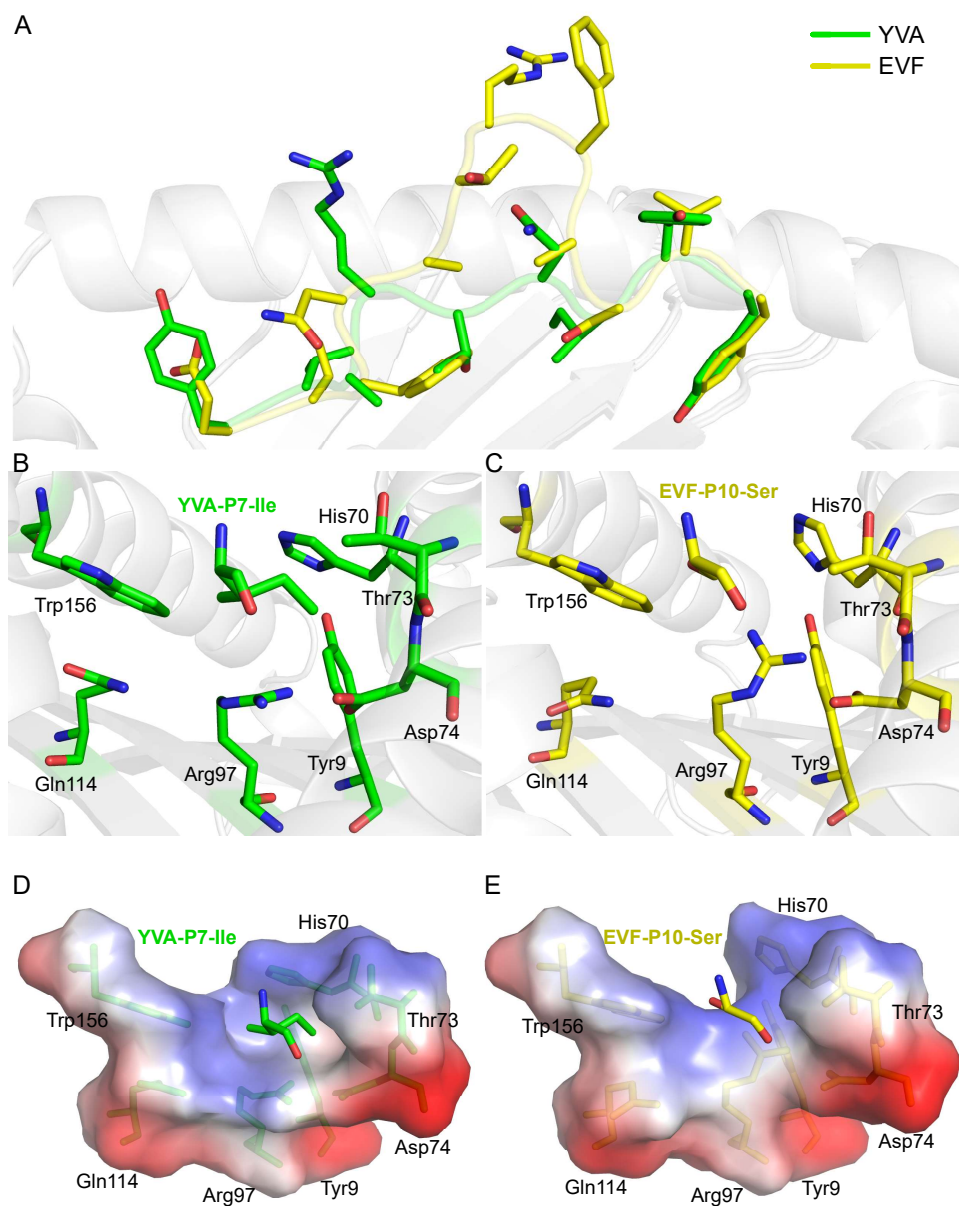

**Figure S3.** Pocket C of HLA-A\*2601/YVA and HLA-A\*2601/EVF complexes. **A:** Overall structure of peptide binding HLA-A\*2601. **B-C:** The different bulged conformation of HLA-A\*2601/YVA(**B**) and HLA-A\*2601/EVF(**C**). The major residues are shown as sticks. **D-E:** The vacuum electrostatic surface shows the key residue that determine the size of the pocket C.

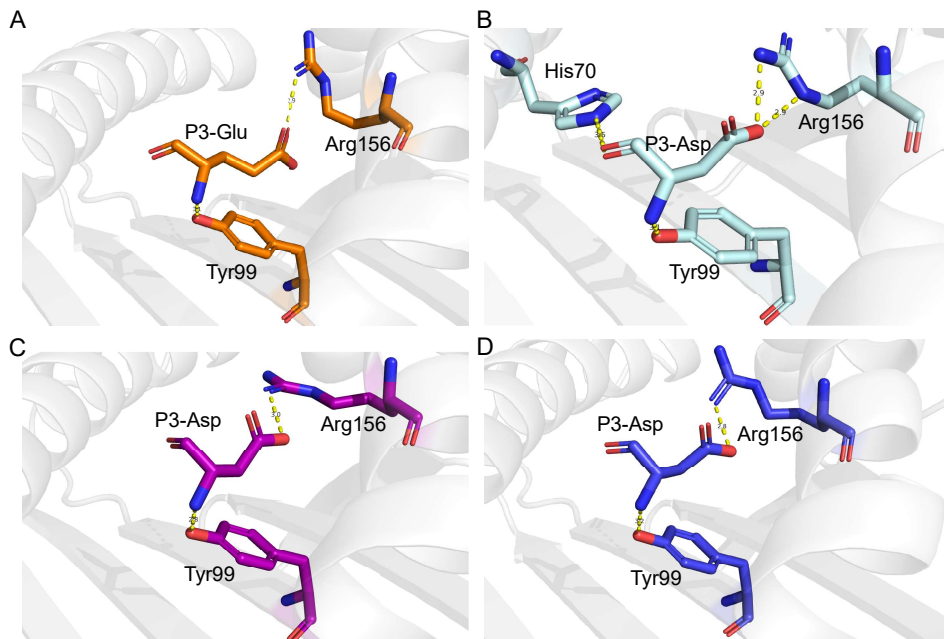

**Figure S4.** Electrostatic character of P3 in HLA-A\*0101 binding peptides. HLA-A\*0101/peptide structures PDB code: 4NQV (**A**, orange), 6MPP (**B**, pale cyan), 1W72 (**C**, purple), 6AT9 (**D**, blue). P3 of peptides and interacting amino acid residues in HLA-A\*0101 are shown in sticks. Hydrogen bonds are shown as yellow dashed lines.

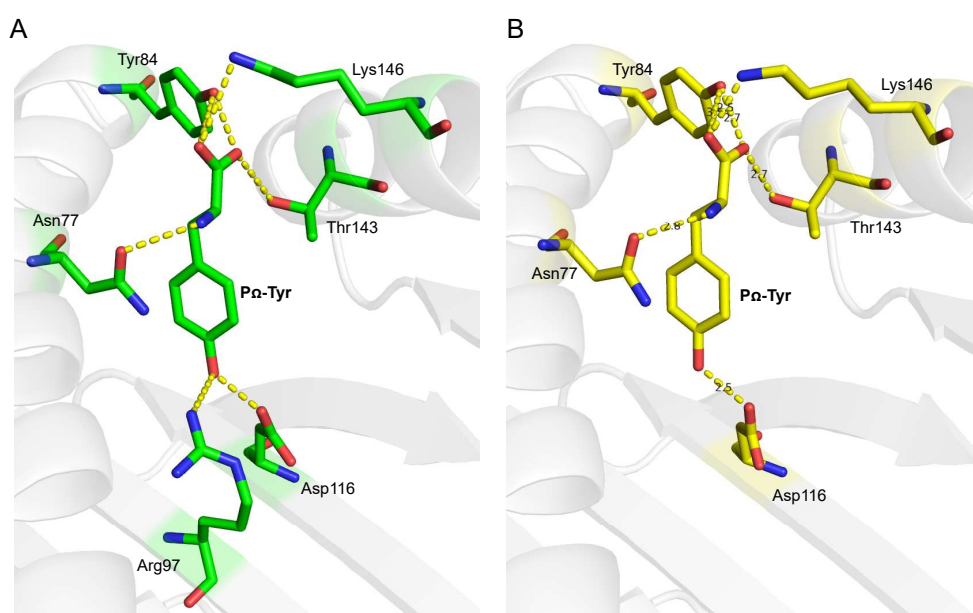

**Figure S5.** Pocket F of HLA-A\*2601/YVA and HLA-A\*2601/EVF complexes. **A:** Key residue of pocket F in HLA-A\*2601/YVA. **B:** Key residue of pocket F in HLA-A\*2601/EVF. P $\alpha$  of peptides and interacting amino acid residues are shown in sticks. Hydrogen bonds are shown as yellow dashed lines.

**Supplemental Table I.** Mutation of CTE (IAV NP44-52) under natural conditions

| Position | Reference <sup>a</sup> (frequency) | Mutation(frequency)                                                          |
|----------|------------------------------------|------------------------------------------------------------------------------|
| 1        | C (99.99532%)                      | R (100%)                                                                     |
| 2        | T (100%)                           |                                                                              |
| 3        | E (99.99352%)                      | G (100%)                                                                     |
| 4        | L (99.98056%)                      | I (66.67%), F (33.33%)                                                       |
| 5        | K (95.44512%)                      | Q (97.87%), R (2.13%)                                                        |
| 6        | L (99.95352%)                      | F (100%)                                                                     |
| 7        | S (89.62032%)                      | N (98.81%), G (0.56%), D (0.31%), R (0.12%), I (0.06%), T (0.06%), X (0.06%) |
| 8        | D (99.95465%)                      | E (71.43%), N (28.57%)                                                       |
| 9        | Y (99.45575%)                      | H (92.86%), N (3.57%), C (2.38%), Q (1.19%)                                  |

<sup>a</sup> Refers to the amino acid with the highest frequency at NP44-52 of the Influenza A virus H1Nx sequence, among a total of 15,435 entries retrieved from the NCBI (<https://www.ncbi.nlm.nih.gov/>).
